# Supplementary material for: A Nationwide Digital Multidisciplinary Intervention Aimed at Promoting Pneumococcal Vaccination in Immunocompromised Patients
Source: MDPI journal article supplement (doi:10.3390/vaccines11081355), 2023-08-11
Supplement: s1 [file s1]

**Table S1.** Characteristics of the targeted intervention population for PPVS23 administration

| Variable                                            | Received PPVS23 vaccine during the intervention | Not received PPVS23 vaccine during the intervention |        |
|-----------------------------------------------------|-------------------------------------------------|-----------------------------------------------------|--------|
| Age (years) – mean (SD)                             | 54.9 (14.7)                                     | 47.7 (13.7)                                         | <0.001 |
| Gender, Female – no. (%)                            | 2904 (50.1)                                     | 7757 (55.5)                                         | <0.001 |
| SES                                                 |                                                 |                                                     |        |
| Low                                                 | 477 (8.2)                                       | 1394 (10)                                           | <0.001 |
| Med                                                 | 3519 (60.8)                                     | 8077 (57.8)                                         |        |
| High                                                | 1795 (31)                                       | 4495 (32.2)                                         |        |
| Residential community                               |                                                 |                                                     |        |
| General                                             | 5256 (90.7)                                     | 12,308 (88)                                         | <0.001 |
| Ultraorthodox Jews                                  | 253 (4.4)                                       | 829 (5.9)                                           |        |
| Arab                                                | 286 (4.9)                                       | 848 (6.1)                                           |        |
| Current Smoker – no. (%)                            | 822 (14.2)                                      | 2186 (15.6)                                         | 0.01   |
| Comorbidities – no. (%)                             |                                                 |                                                     |        |
| HTN                                                 | 2333 (40.3)                                     | 3193 (22.8)                                         | <0.001 |
| DM                                                  | 1201 (20.7)                                     | 1551 (11.1)                                         | <0.001 |
| IHD                                                 | 703 (12.1)                                      | 776 (5.5)                                           | <0.001 |
| COPD                                                | 261 (4.5)                                       | 249 (1.8)                                           | <0.001 |
| Dementia                                            | 58 (1)                                          | 63 (0.5)                                            | <0.001 |
| Cancer                                              | 734 (12.7)                                      | 2962 (21.2)                                         | <0.001 |
| OP                                                  | 1117 (19.3)                                     | 1377 (9.8)                                          | <0.001 |
| IBD                                                 | 949 (16.4)                                      | 2167 (15.5)                                         | 0.122  |
| Time from entry to registry, (Yr) – mean (SD)       | 6.0 (5.5)                                       | 5.3 (5.2)                                           | <0.001 |
| Number of primary care visits, per month, mean (SD) | 1.5 (0.8)                                       | 1.1 (0.8)                                           | <0.001 |
| Family physician specialist / intern no. (%)        | 2614 (45.1)                                     | 6137 (43.9)                                         | 0.114  |
| Internal / general medicine specialist no. (%)      | 3181 (54.9)                                     | 7848 (56.1)                                         |        |
| Primary care physician age, mean (SD)               | 54.9 (10.4)                                     | 54.5 (10.3)                                         | 0.003  |
